# Supplementary material for: Minimizing Errors in the Prediction of Water Levels Using Kriging Technique in Residuals of the Groundwater Model (MODFLOW)
Source: Preprints.org preprint supplement (doi:10.20944/preprints202109.0293.v1), 2021-09-16
Supplement: Supplementary file 1 [file supplementary]

## Sheet: Water Levels
Table A1: Predicted water head for observation points for the the years 1995 through 2000
		Year 1995
		Observation Well	Observed Head (m)	MODFLOW (m)		MODFLOW + Kriging (m)
				Simulated Head	Residuals	Simulated Head	Residuals
		1	787.298	804.879	-17.5809	786.013	1.28519
		2	751.911	785.57	-33.6591	753.813	-1.90196
		3	750.631	784.54	-33.909	751.583	-0.952235
		4	752.49	776.463	-23.9725	751.673	0.816779
		5	741.487	776.74	-35.2532	748.609	-7.12213
		6	736.092	768.245	-32.1534	742.266	-6.17431
		7	718.109	733.062	-14.9535	709.188	8.92055
		8	754.258	828.943	-74.6851	724.958	29.3002
		9	840.334	972.089	-131.756	839.569	0.764508
		10	893.43	954.106	-60.6765	876.147	17.2824
		11	900.044	934.511	-34.4668	880.16	19.8843
		12	650.199	700.177	-49.9781	645.146	5.05346
		13	586.71	608.518	-21.8084	588	-1.29073
				Mean =	-43.4502		5.06661
				St Error=	8.73555		3.01907
		Year 1996
		Observation Well	Observed Head (m)	MODFLOW (m)		MODFLOW + Kriging (m)
				Simulated Head	Residuals	Simulated Head	Residuals
		1	641.625	653.534	-11.9085	622.449	19.1766
		2	642.331	682.447	-40.1165	635.729	6.60173
		3	718.246	756.937	-38.6913	714.842	3.40436
		4	1056.03	995.074	60.957	1035.36	20.6723
		5	878.251	993.511	-115.26	850.394	27.8563
		6	842.772	980.913	-138.141	849.654	-6.88183
		7	609.31	680.048	-70.738	579.547	29.7638
		8	586.755	608.359	-21.6042	576.115	10.6407
		9	677.631	736.281	-58.6496	690.272	-12.6408
		10	618.942	663.766	-44.8239	618.945	-0.0034424
		11	652.699	602.352	50.3469	600.64	52.0588
		12	599.755	597.033	2.72186	610.979	-11.2241
		13	612.648	628.36	-15.7124	612.187	0.46094
		14	629.625	628.004	1.62154	650.129	-20.5033
				Mean =	-31.4285		8.52729
				St Error=	14.6787		5.2786
Table A1: Predicted water head for observation points for the the years 1995 through 2000 (Continued)
		Year 1997
		Observation Well	Observed Head (m)	MODFLOW (m)		MODFLOW + Kriging (m)
				Simulated Head	Residuals	Simulated Head	Residuals
		1	630.988	649.352	-18.3642	642.096	-11.1079
		2	593.324	595.088	-1.76479	611.803	-18.4792
		3	615.848	656.71	-40.8615	622.675	-6.82621
		4	776.326	804.456	-28.13	779.46	-3.13387
		5	772.881	801.682	-28.8006	772.589	0.292244
		6	771.479	801.682	-30.2026	773.418	-1.93918
		7	926.501	933.416	-6.91591	927.221	-0.720383
		8	879.311	912.166	-32.8544	856.021	23.2902
		9	932.048	938.747	-6.6995	906.155	25.8925
		10	906.841	927.238	-20.3972	895.115	11.7263
		11	668.091	724.68	-56.5892	668.882	-0.79089
		12	614.202	696.55	-82.3478	628.342	-14.1398
		13	520.208	529.032	-8.82396	497.936	22.2722
		14	660.563	697.117	-36.5547	652.23	8.33297
		15	659.1	652.437	6.66293	659.149	-0.0498076
		16	336.027	319.793	16.2336	315.423	20.6039
		17	346.756	388.989	-42.2331	308.048	38.7078
				Mean =	-24.626		5.52534
				St Error=	5.85072		3.85675
		Year 1998
		Observation Well	Observed Head (m)	MODFLOW (m)		MODFLOW + Kriging (m)
				Simulated Head	Residuals	Simulated Head	Residuals
		1	762.091	779.078	-16.9865	761.34	0.751369
		2	765.505	796.875	-31.37	772.534	-7.02878
		3	770.626	792.648	-22.0218	769.221	1.40496
		4	769.102	800.341	-31.239	775.547	-6.44466
		5	810.219	944.706	-134.487	897.487	-87.2678
		6	846.491	911.562	-65.0718	835.295	11.1956
		7	890.946	919.362	-28.4165	874.332	16.6136
		8	656.524	719.703	-63.1789	656.219	0.304921
		9	645.612	687.111	-41.4985	634.387	11.2253
		10	646.719	701.592	-54.8731	650.834	-4.11506
		11	642.887	694.819	-51.9318	648.431	-5.54349
		12	609.082	667.503	-58.421	607.494	1.58758
		13	622.865	623.453	-0.588264	613.327	9.53766
		14	666.232	604.208	62.0238	593.351	72.8811
		15	317.656	351.37	-33.7139	329.822	-12.1654
				Mean =	-38.1183		0.195794
				St Error=	10.6649		8.11725
Table A1: Predicted water head for observation points for the the years 1995 through 2000 (Continued)
		Year 1999
		Observation Well	Observed Head (m)	MODFLOW (m)		MODFLOW + Kriging (m)
				Simulated Head	Residuals	Simulated Head	Residuals
		1	781.507	791.822	-10.3144	765.458	16.0497
		2	774.192	798.213	-24.0213	775.069	-0.876954
		3	752.155	771.452	-19.2969	752.023	0.131704
		4	757.55	786.878	-29.3279	757.292	0.257513
		5	739.116	764.481	-25.3655	741.673	-2.55795
		6	926.555	933.072	-6.51662	965.12	-38.5648
		7	1059.48	993.971	65.5137	1023.73	35.7507
		8	698.845	737.269	-38.4231	698.181	0.664535
		9	667.969	722.766	-54.7969	670.628	-2.65919
		10	641.232	706.627	-65.3948	635.623	5.60944
		11	650.123	699.486	-49.3624	659.533	-9.41
		12	619.445	652.997	-33.5524	598.649	20.7965
		13	644.853	701.555	-56.7019	653.742	-8.88912
		14	652.988	689.973	-36.9844	639.858	13.1303
		15	606.445	666.089	-59.6433	596.729	9.71686
		16	596.174	664.278	-68.1045	600.912	-4.73846
		17	612.191	581.162	31.0286	604.608	7.58248
				Mean =	-28.3096		2.47019
				St Error=	8.42977		3.79261
		Year 2000
		Observation Well	Observed Head (m)	MODFLOW (m)		MODFLOW + Kriging (m)
				Simulated Head	Residuals	Simulated Head	Residuals
		1	769.01	786.908	-17.8979	764.445	4.5652
		2	745.669	760.089	-14.4201	741.822	3.84706
		3	748.299	868.826	-120.527	797.159	-48.8594
		4	1059.21	993.596	65.6143	1034.56	24.655
		5	662.239	713.186	-50.9473	652.279	9.96003
		6	548.884	595.918	-47.0337	552.459	-3.57541
		7	586.642	608.225	-21.5829	574.681	11.9612
		8	648.782	694.971	-46.1894	647.155	1.62672
		9	585.048	617.674	-32.6258	570.106	14.9425
		10	616.123	663.839	-47.7164	618.443	-2.32063
		11	613.355	619.521	-6.1661	602.237	11.1179
		12	618.509	623.331	-4.82194	629.428	-10.9184
		13	623.578	620.561	3.01752	624.108	-0.530119
		14	588.874	568.33	20.5435	593.957	-5.08349
		15	555.132	568.4	-13.2679	592.964	-37.8321
		16	346.283	344.717	1.56667	347.444	-1.16066
				Mean =	-20.7784		-1.72528
				St Error=	9.97323		4.64177
